# Supplementary material for: Characterization of Li-doped WO3nanowires and their enhanced electrocatalytic oxidation of ascorbic acid
Source: Royal Society of Chemistry journal article supplement (doi:10.1039/c4ra07575g), 2014-01-01
Supplement: c4ra07575g1.pdf [file c4ra07575g1.pdf]

## Supporting information

### **Characterizations of Li-doped WO<sub>3</sub> nanowires and their enhanced electrocatalytic oxidation of ascorbic acid**

*Wanjun Mu, Xiang Xie, Rui Zhang, Xingliang Li, Kai Lv, Qianhong Yu, Hongyuan*

*Wei\*, Yuan Jian*

*Institute of Nuclear Chemistry and Physics, China Academy of Engineering Physics, 64#*

*Mianshan Road, Mianyang, 621900, Sichuan Province, P. R. China*

---

\* Corresponding author: Tel: +86 816 2494854.

*E-mail address:* muwj2014@163.com

**Table 1 The ratios of Li/W in Li-doped WO<sub>3</sub> nanowires**

| The precursors' ratios of Li/W | The real ratios of Li/W |
|--------------------------------|-------------------------|
| 0.01                           | $0.01 \pm 0.0021$       |
| 0.03                           | $0.03 \pm 0.0048$       |
| 0.05                           | $0.05 \pm 0.0032$       |
| 0.07                           | $0.07 \pm 0.0072$       |
| 0.10                           | $0.10 \pm 0.0019$       |
